# Supplementary material for: Gasdermin B, an asthma-susceptibility gene, promotes MAVS-TBK1 signalling and airway inflammation
Source: PubMed Central journal article supplement — Eur Respir J. 2024 May 2;63(5):2301232. doi: 10.1183/13993003.01232-2023 (PMC11063620; doi:10.1183/13993003.01232-2023), 2024-05-02

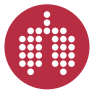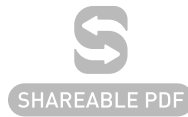

# Gasdermin B, an asthma-susceptibility gene, promotes MAVS-TBK1 signalling and airway inflammation

Tao Liu<sup>1</sup>, Siqi Liu<sup>1,7</sup>, Xianliang Rui<sup>1,7</sup>, Ye Cao<sup>2</sup>, Julian Hecker<sup>1</sup>, Feng Guo<sup>1</sup>, Yihan Zhang<sup>3</sup>, Lu Gong<sup>1</sup>, Yihan Zhou , Yuzhen Yu<sup>1</sup>, Nandini Krishnamoorthyni<sup>4</sup>, Samuel Bates<sup>1</sup>, Sung Chun , Nathan Boyer , Shuang Xu<sup>1</sup>, Jin-Ah Park<sup>6</sup>, Mark A. Perrella , Bruce D. Levy , Scott T. Weiss , Hongmei Mou , Benjamin A. Raby<sup>1,4,5,8</sup> and Xiaobo Zhou<sup>1,8</sup>

<sup>1</sup>Channing Division of Network Medicine, Brigham and Women's Hospital and Harvard Medical School, Boston, MA, USA. <sup>2</sup>Division of Rheumatology, Inflammation, and Immunity, Brigham and Women's Hospital and Harvard Medical School, Boston, MA, USA. <sup>3</sup>The Mucosal Immunology and Biology Research Center, Massachusetts General Hospital and Harvard Medical School, Boston, MA, USA. <sup>4</sup>Division of Pulmonary and Critical Care Medicine, Brigham and Women's Hospital and Harvard Medical School, Boston, MA, USA. <sup>5</sup>Division of Pulmonary Medicine, Department of Pediatrics, Boston Children's Hospital and Harvard Medical School, Boston, MA, USA. <sup>6</sup>Department of Environmental Health, Harvard T.H. Chan School of Public Health, Boston, MA, USA. <sup>7</sup>These authors contributed equally. <sup>8</sup>These authors jointly conceptualised and supervised this work.

Corresponding author: Xiaobo Zhou (xiaobo.zhou@channing.harvard.edu)

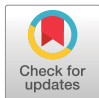

Shareable abstract (@ERSpublications)

**Asthma GWAS gene *GSDMB* promotes the induction of ISGs, mucus production and lung inflammation post-respiratory virus infection *in vivo*. In cellular models, *GSDMB* recognises and binds viral RNA, thereby activating viral RNA-induced MAVS-TBK1 signalling.** <https://bit.ly/48CVGxX>

**Cite this article as:** Liu T, Liu S, Rui X, *et al.* Gasdermin B, an asthma-susceptibility gene, promotes MAVS-TBK1 signalling and airway inflammation. *Eur Respir J* 2024; 63: 2301232 [DOI: 10.1183/13993003.01232-2023].

This extracted version can be shared freely online.

Copyright ©The authors 2024.

This version is distributed under the terms of the Creative Commons Attribution Non-Commercial Licence 4.0. For commercial reproduction rights and permissions contact [permissions@ersnet.org](mailto:permissions@ersnet.org)

This article has an editorial commentary:  
<https://doi.org/10.1183/13993003.02223-2023>

Received: 3 March 2023  
Accepted: 31 Dec 2023

## Abstract

**Rationale** Respiratory virus-induced inflammation is the leading cause of asthma exacerbation, frequently accompanied by induction of interferon-stimulated genes (ISGs). How asthma-susceptibility genes modulate cellular response upon viral infection by fine-tuning ISG induction and subsequent airway inflammation in genetically susceptible asthma patients remains largely unknown.

**Objectives** To decipher the functions of gasdermin B (encoded by *GSDMB*) in respiratory virus-induced lung inflammation.

**Methods** In two independent cohorts, we analysed expression correlation between *GSDMB* and ISGs. In human bronchial epithelial cell line or primary bronchial epithelial cells, we generated *GSDMB*-overexpressing and *GSDMB*-deficient cells. A series of quantitative PCR, ELISA and co-immunoprecipitation assays were performed to determine the function and mechanism of *GSDMB* for ISG induction. We also generated a novel transgenic mouse line with inducible expression of human unique *GSDMB* gene in airway epithelial cells and infected the mice with respiratory syncytial virus to determine the role of *GSDMB* in respiratory syncytial virus-induced lung inflammation *in vivo*.

**Results** *GSDMB* is one of the most significant asthma-susceptibility genes at 17q21 and acts as a novel RNA sensor, promoting mitochondrial antiviral-signalling protein (MAVS)-TANK binding kinase 1 (TBK1) signalling and subsequent inflammation. In airway epithelium, *GSDMB* is induced by respiratory viral infections. Expression of *GSDMB* and ISGs significantly correlated in respiratory epithelium from two independent asthma cohorts. Notably, inducible expression of human *GSDMB* in mouse airway epithelium led to enhanced ISGs induction and increased airway inflammation with mucus hypersecretion upon respiratory syncytial virus infection.

**Conclusions** *GSDMB* promotes ISGs expression and airway inflammation upon respiratory virus infection, thereby conferring asthma risk in risk allele carriers.

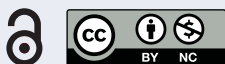

Supplement: ERJ-01232-2023.Shareable.pdf [file ERJ-01232-2023.Shareable.pdf]
